# Supplementary material for: The equilibrium molecular structures of 2-deoxyribose and fructose by the semiexperimental mixed estimation method and coupled-cluster computations
Source: Royal Society of Chemistry journal article supplement (doi:10.1039/c6cp01842d), 2016-01-01
Supplement: c6cp01842d1.pdf [file c6cp01842d1.pdf]

## Supplementary Information

### The equilibrium molecular structures of 2-deoxyribose and fructose by the semiexperimental mixed estimation method and coupled-cluster computations

Natalja Vogt<sup>a,b,\*</sup>, Jean Demaison<sup>a</sup>, Emilio J. Cocinero<sup>c</sup>, Patricia Écija<sup>c</sup>, Alberto Lesarri<sup>d</sup>, Heinz Dieter Rudolph<sup>a</sup>, Jürgen Vogt<sup>a</sup>

<sup>a</sup>*Section of Chemical Information Systems, Faculty of Sciences, University of Ulm, 89069 Ulm, Germany*

<sup>b</sup>*Department of Chemistry, Lomonosov Moscow State University, 119991 Moscow, Russia*

<sup>c</sup>*Departamento de Química Física, Facultad de Ciencia y Tecnología, Universidad del País Vasco (UPV-EHU), 48080 Bilbao, Spain*

<sup>d</sup>*Departamento de Química Física y Química Inorgánica, Facultad de Ciencias, Universidad de Valladolid, 47011 Valladolid, Spain*

\*Corresponding author. E-mail address: natalja.vogt@uni-ulm.de

Table S1. Observed rotational transitions of fructose ( $\nu_{\text{obs}}$ ) and residuals ( $\nu_{\text{obs}}-\nu_{\text{calc}}$ ) of the fit of Table S3 ( $^{18}\text{O}_6$  species), all values in MHz.

| $J'$ | $Ka'$ | $Kc'$ | $J''$ | $Ka''$ | $Kc''$ | $\nu_{\text{obs}}$ | $\nu_{\text{obs}}-\nu_{\text{calc}}$ |
|------|-------|-------|-------|--------|--------|--------------------|--------------------------------------|
| 5    | 2     | 3     | 4     | 1      | 3      | 9097.689           | 0.001                                |
| 4    | 4     | 0     | 3     | 3      | 0      | 10846.481          | 0.000                                |
| 3    | 3     | 1     | 2     | 2      | 1      | 7957.144           | -0.001                               |
| 6    | 2     | 4     | 5     | 1      | 4      | 10656.749          | 0.000                                |
| 4    | 2     | 3     | 3     | 1      | 3      | 8276.063           | 0.000                                |
| 3    | 3     | 0     | 2     | 2      | 0      | 7933.932           | 0.002                                |
| 3    | 2     | 1     | 2     | 1      | 1      | 6297.825           | 0.004                                |
| 4    | 2     | 2     | 3     | 1      | 2      | 7653.897           | 0.000                                |
| 4    | 3     | 2     | 3     | 2      | 2      | 9378.194           | 0.001                                |
| 4    | 3     | 1     | 3     | 2      | 1      | 9271.084           | 0.000                                |
| 5    | 3     | 2     | 4     | 2      | 2      | 10557.744          | 0.000                                |
| 6    | 3     | 3     | 5     | 2      | 3      | 11811.065          | 0.001                                |
| 5    | 4     | 1     | 4     | 3      | 1      | 12221.652          | 0.000                                |
| 4    | 4     | 1     | 3     | 3      | 1      | 10848.864          | 0.001                                |
| 6    | 4     | 2     | 5     | 3      | 2      | 13574.387          | 0.000                                |
| 6    | 4     | 3     | 5     | 3      | 3      | 13634.508          | -0.002                               |
| 5    | 5     | 0     | 4     | 4      | 0      | 13749.327          | 0.000                                |
| 5    | 5     | 1     | 4     | 4      | 1      | 13749.524          | -0.002                               |
| 6    | 1     | 6     | 5     | 1      | 5      | 7622.944           | -0.001                               |
| 6    | 0     | 6     | 5     | 0      | 5      | 7687.622           | 0.000                                |

Table S2. Ground state rotational parameters of the isotopologues of deoxyribose (c- $\beta$ -2-deoxy-D-ribofuranose,  ${}^1C_4$ -1 conformer) <sup>a</sup>.

|               | Parent | ${}^{13}C1$     | ${}^{13}C2$     | ${}^{13}C3$     | ${}^{13}C4$     | ${}^{13}C5$    | ${}^{18}O6$    |                 |
|---------------|--------|-----------------|-----------------|-----------------|-----------------|----------------|----------------|-----------------|
| <i>A</i>      | MHz    | 2437.82519(13)  | 2432.6910(11)   | 2417.5851(11)   | 2428.91157(33)  | 2428.0033(29)  | 2410.4359(26)  | 2408.8515(21)   |
| <i>B</i>      | MHz    | 1510.728846(86) | 1499.57261(13)  | 1508.36532(13)  | 1507.072715(39) | 1505.32554(45) | 1507.65494(30) | 1495.28173(15)  |
| <i>C</i>      | MHz    | 1144.979958(82) | 1139.153854(80) | 1141.809999(90) | 1141.768500(27) | 1141.29514(20) | 1139.73939(23) | 1131.440878(75) |
| $\Delta_J$    | kHz    | 0.1067(10)      | 0.10540(19)     | 0.10606(95)     | 0.10654(27)     | 0.1064(11)     | 0.1048(20)     | 0.10224(12)     |
| $\Delta_{JK}$ | kHz    | -0.04349(42)    | -0.043138(78)   | -0.04221(38)    | -0.04076(10)    | 0.3285(70)     | 0.3196(64)     | 0.30068(36)     |
| $\Delta_K$    | kHz    | 0.3304(31)      | 0.33019(59)     | 0.3214(29)      | 0.32221(84)     | -0.04547(48)   | -0.04038(81)   | -0.025270(30)   |
| $\delta_J$    | kHz    | 0.01959(19)     | 0.019109(34)    | 0.01906(17)     | 0.019554(51)    | 0.01945(20)    | 0.01930(38)    | 0.018545(22)    |
| $\delta_K$    | kHz    | 0.08343(81)     | 0.08220(14)     | 0.08150(74)     | 0.08469(22)     | 0.08159(86)    | 0.0823(16)     | 0.08621(10)     |

<sup>a</sup> This work, A-reduction, representation I<sup>r</sup>.

Table S3. Ground state rotational parameters of the isotopologues of fructose (cc- $\beta$ -D-fructopyranose,  ${}^2C_5$  conformer)<sup>a,b</sup>.

|             | <i>A</i> / MHz   | <i>B</i> / MHz | <i>C</i> / MHz | $\Delta_J$ / kHz | $\Delta_{JK}$ / kHz | $\Delta_K$ / kHz | $\delta_J$ / kHz | $\delta_K$ / kHz |
|-------------|------------------|----------------|----------------|------------------|---------------------|------------------|------------------|------------------|
| Parent      | 1 465.277876(82) | 770.569989(50) | 609.969040(48) | 0.01858(16)      | 0.03115(28)         | 0.04752(43)      | 0.003177(28)     | 0.02417(22)      |
| ${}^{13}C1$ | 1 461.73951(15)  | 764.21815(11)  | 606.47487(29)  | 0.01827(15)      | 0.02989(25)         | 0.04871(84)      | 0.003086(26)     | 0.02327(19)      |
| ${}^{13}C2$ | 1 465.32193(13)  | 769.505785(98) | 609.30340(25)  | 0.01855(26)      | 0.03086(44)         | 0.04808(69)      | 0.003172(45)     | 0.02399(34)      |
| ${}^{13}C3$ | 1 461.35556(11)  | 770.379640(85) | 609.36049(26)  | 0.01851(19)      | 0.03130(33)         | 0.04700(50)      | 0.003170(34)     | 0.02420(26)      |
| ${}^{13}C4$ | 1 463.46908(13)  | 767.830223(93) | 608.23584(16)  | 0.01832(31)      | 0.03196(54)         | 0.04610(78)      | 0.003127(53)     | 0.02431(41)      |
| ${}^{13}C5$ | 1 460.57051(13)  | 767.00406(12)  | 607.07390(17)  | 0.01846(33)      | 0.02937(53)         | 0.04916(88)      | 0.003204(57)     | 0.02349(42)      |
| ${}^{13}C6$ | 1 450.301268(80) | 769.811572(69) | 607.56700(10)  | 0.01847(19)      | 0.03018(31)         | 0.04582(47)      | 0.003193(33)     | 0.02404(25)      |
| $D_R$ -C2   | 1 450.487053(77) | 762.129587(66) | 607.20816(32)  | 0.01824(11)      | 0.02766(17)         | 0.04806(30)      | 0.002982(18)     | 0.02145(13)      |
| $D_S$ -C2   | 1 454.38676(21)  | 762.80239(18)  | 604.4125(10)   | 0.01796(31)      | 0.02729(47)         | 0.04931(85)      | 0.003065(53)     | 0.02191(38)      |
| ${}^{18}O6$ | 1 450.793946(72) | 769.50226(10)  | 606.801863(90) | 0.01832(25)      | 0.03297(46)         | 0.04037(56)      | 0.003156(44)     | 0.02499(35)      |

<sup>a</sup> This work, A-reduction, representation I<sup>r</sup>.

<sup>b</sup> For definition of labeling R and S for hydrogen atoms, see Fig. 1.

Table S4. DFT and *ab initio* structures of deoxyribose (in Å and degrees)

| Method <sup>a</sup> | B3LYP              | MP2     | MP2                | MP2       | MP2_AE    | MP2     | CCSD    | CCSD(T) |
|---------------------|--------------------|---------|--------------------|-----------|-----------|---------|---------|---------|
| Basis set           | 6-311 <sup>b</sup> | cc-pVTZ | 6-311 <sup>b</sup> | cc-pwCVTZ | cc-pwCVTZ | cc-pVQZ | cc-pVTZ | cc-pVTZ |
| C1C2                | 1.5255             | 1.5168  | 1.5177             | 1.5155    | 1.5123    | 1.5150  | 1.5205  | 1.5224  |
| C1O6                | 1.4212             | 1.4207  | 1.4181             | 1.4194    | 1.4170    | 1.4177  | 1.4149  | 1.4224  |
| C1O1                | 1.4106             | 1.4070  | 1.4054             | 1.4060    | 1.4036    | 1.4050  | 1.4043  | 1.4093  |
| C1H1                | 1.0922             | 1.0905  | 1.0913             | 1.0903    | 1.0890    | 1.0897  | 1.0905  | 1.0925  |
| C2C3                | 1.5340             | 1.5252  | 1.5252             | 1.5239    | 1.5207    | 1.5229  | 1.5285  | 1.5301  |
| C2H2q               | 1.0886             | 1.0879  | 1.0884             | 1.0875    | 1.0861    | 1.0870  | 1.0883  | 1.0904  |
| C2H2x               | 1.0917             | 1.0906  | 1.0910             | 1.0902    | 1.0888    | 1.0897  | 1.0916  | 1.0939  |
| C3C4                | 1.5343             | 1.5238  | 1.5245             | 1.5224    | 1.5193    | 1.5219  | 1.5270  | 1.5290  |
| C3O3                | 1.4167             | 1.4158  | 1.4137             | 1.4146    | 1.4122    | 1.4134  | 1.4122  | 1.4177  |
| C3H3                | 1.0908             | 1.0897  | 1.0906             | 1.0895    | 1.0881    | 1.0891  | 1.0900  | 1.0924  |
| C4C5                | 1.5204             | 1.5130  | 1.5141             | 1.5116    | 1.5084    | 1.5113  | 1.5167  | 1.5197  |
| C4O4                | 1.4305             | 1.4281  | 1.4248             | 1.4270    | 1.4245    | 1.4250  | 1.4246  | 1.4305  |
| C4H4                | 1.0910             | 1.0897  | 1.0906             | 1.0896    | 1.0882    | 1.0892  | 1.0898  | 1.0917  |
| C5O6                | 1.4321             | 1.4310  | 1.4289             | 1.4299    | 1.4273    | 1.4283  | 1.4266  | 1.4339  |
| C5H5q               | 1.0883             | 1.0872  | 1.0876             | 1.0869    | 1.0855    | 1.0863  | 1.0877  | 1.0896  |
| C5H5x               | 1.0925             | 1.0909  | 1.0915             | 1.0905    | 1.0891    | 1.0902  | 1.0913  | 1.0935  |
| O3H3                | 0.9651             | 0.9664  | 0.9650             | 0.9657    | 0.9649    | 0.9645  | 0.9620  | 0.9658  |
| O4H4                | 0.9635             | 0.9655  | 0.9643             | 0.9648    | 0.9640    | 0.9636  | 0.9610  | 0.9649  |
| O1H1                | 0.9625             | 0.9635  | 0.9623             | 0.9629    | 0.9620    | 0.9617  | 0.9596  | 0.9629  |
| C2C1O6              | 111.78             | 111.64  | 111.58             | 111.67    | 111.66    | 111.63  | 111.70  | 111.59  |
| C2C1O1              | 108.23             | 107.51  | 107.53             | 107.50    | 107.53    | 107.57  | 107.79  | 107.68  |
| C2C1H1              | 111.01             | 111.39  | 111.47             | 111.39    | 111.35    | 111.43  | 111.03  | 111.25  |
| O1C1O6              | 111.53             | 111.64  | 111.51             | 111.64    | 111.63    | 111.56  | 111.51  | 111.53  |
| O1C1H1              | 103.84             | 103.76  | 103.91             | 103.76    | 103.79    | 103.81  | 104.09  | 103.93  |
| H1C1O1              | 110.45             | 110.94  | 110.89             | 110.93    | 110.92    | 110.89  | 110.74  | 110.90  |
| C1C2C3              | 112.34             | 111.66  | 111.50             | 111.67    | 111.68    | 111.73  | 111.72  | 112.12  |
| C1C2H2q             | 109.78             | 109.84  | 109.89             | 109.81    | 109.82    | 109.84  | 109.78  | 109.84  |
| C1C2H2x             | 108.13             | 108.41  | 108.40             | 108.42    | 108.44    | 108.37  | 108.35  | 108.18  |
| C3C2H2q             | 110.10             | 110.25  | 110.22             | 110.24    | 110.23    | 110.19  | 110.26  | 109.84  |
| C3C2H2x             | 109.00             | 108.76  | 108.89             | 108.79    | 108.79    | 108.81  | 108.87  | 110.20  |
| H2qC2H2x            | 107.35             | 107.82  | 107.85             | 107.81    | 107.78    | 107.80  | 107.74  | 108.63  |
| C2C3C4              | 110.29             | 109.52  | 109.51             | 109.55    | 109.55    | 109.61  | 109.69  | 110.03  |
| O3C3C2              | 111.48             | 111.27  | 111.30             | 111.30    | 111.31    | 111.27  | 111.36  | 111.16  |
| H3C3C2              | 109.45             | 109.77  | 109.83             | 109.75    | 109.73    | 109.79  | 109.56  | 109.62  |
| C4C3O3              | 110.98             | 110.48  | 110.63             | 110.51    | 110.51    | 110.63  | 110.67  | 110.44  |
| C4C3H3              | 108.31             | 108.97  | 108.86             | 108.93    | 108.90    | 108.82  | 108.74  | 108.74  |
| O3C3H3              | 106.20             | 106.77  | 106.65             | 106.74    | 106.77    | 106.65  | 106.75  | 106.78  |
| C3C4C5              | 109.97             | 109.95  | 109.76             | 109.94    | 109.94    | 109.81  | 109.89  | 109.85  |
| O4C4C3              | 110.19             | 109.50  | 109.66             | 109.53    | 109.55    | 109.68  | 109.73  | 109.52  |
| H4C4C3              | 109.27             | 109.51  | 109.49             | 109.50    | 109.46    | 109.48  | 109.46  | 109.60  |
| C5C4O4              | 111.57             | 110.86  | 110.95             | 110.90    | 110.92    | 111.00  | 110.98  | 110.75  |
| C5C4H4              | 109.96             | 110.56  | 110.55             | 110.53    | 110.50    | 110.44  | 110.31  | 110.60  |
| O4C4H4              | 105.78             | 106.40  | 106.37             | 106.38    | 106.41    | 106.36  | 106.40  | 106.46  |
| C4C5C6              | 110.60             | 109.82  | 109.77             | 109.84    | 109.86    | 109.92  | 110.07  | 109.88  |
| C4C5H5q             | 110.79             | 110.72  | 110.78             | 110.74    | 110.73    | 110.77  | 110.60  | 110.69  |
| C4C5H5x             | 110.16             | 110.44  | 110.34             | 110.42    | 110.41    | 110.30  | 110.30  | 110.41  |
| O6C5H5q             | 105.83             | 105.75  | 105.79             | 105.75    | 105.80    | 105.77  | 105.96  | 105.79  |
| O6C5H5x             | 110.45             | 110.60  | 110.56             | 110.59    | 110.60    | 110.56  | 110.61  | 110.52  |
| H5C5H5x             | 108.92             | 109.43  | 109.51             | 109.41    | 109.36    | 109.44  | 109.22  | 109.45  |
| C1O6C5              | 113.86             | 112.04  | 112.46             | 112.07    | 112.10    | 112.34  | 112.80  | 112.38  |

|           |         |         |         |         |         |         |         |         |
|-----------|---------|---------|---------|---------|---------|---------|---------|---------|
| C3O3H3    | 106.94  | 104.80  | 105.71  | 104.87  | 104.96  | 105.45  | 105.66  | 104.98  |
| C4O4H4    | 108.15  | 105.83  | 106.58  | 105.88  | 105.98  | 106.42  | 106.73  | 106.02  |
| C1O1H1    | 108.56  | 107.18  | 107.78  | 107.21  | 107.31  | 107.57  | 107.58  | 107.21  |
| C3C2C1O6  | -50.33  | -52.79  | -52.76  | -52.71  | -52.70  | -52.47  | -52.15  | -51.59  |
| O6C1C2H2q | -173.19 | -175.42 | -175.27 | -175.31 | -175.30 | -175.06 | -174.79 | -174.47 |
| O6C1C2H2x | 69.99   | 66.99   | 67.09   | 67.13   | 67.17   | 67.41   | 67.79   | 68.17   |
| O1C1C2C3  | 72.87   | 69.98   | 69.82   | 70.06   | 70.08   | 70.23   | 70.69   | 71.11   |
| O1C1C2H2q | -49.98  | -52.65  | -52.70  | -52.54  | -52.52  | -52.36  | -51.95  | -51.77  |
| O1C1C2H2x | -166.80 | -170.23 | -170.33 | -170.09 | -170.06 | -169.89 | -169.38 | -169.12 |
| H1C1C2C3  | -165.77 | -168.28 | -168.45 | -168.22 | -168.21 | -168.03 | -167.85 | -167.17 |
| H1C1C2H2q | 71.38   | 69.09   | 69.04   | 69.18   | 69.19   | 69.37   | 69.51   | 69.95   |
| H1C1C2H2x | -45.44  | -48.49  | -48.60  | -48.37  | -48.35  | -48.16  | -47.92  | -47.41  |
| C2C1O6C5  | 56.83   | 59.23   | 59.00   | 59.14   | 59.08   | 58.79   | 58.65   | 58.94   |
| O1C1O6C5  | -64.49  | -61.15  | -61.27  | -61.24  | -61.33  | -61.59  | -62.04  | -61.54  |
| H1C1O6C5  | 176.57  | 179.31  | 179.23  | 179.23  | 179.14  | 178.94  | 178.53  | 178.92  |
| C2C1O1H1  | 175.38  | 175.91  | 175.45  | 176.02  | 175.98  | 175.57  | 176.05  | 176.33  |
| O6C1O1H1  | -61.27  | -61.32  | -61.92  | -61.19  | -61.23  | -61.69  | -61.00  | -60.93  |
| H1C1O1H1  | 53.67   | 53.89   | 53.36   | 54.01   | 54.00   | 53.50   | 54.41   | 54.40   |
| C1C2C3C4  | 48.83   | 50.20   | 50.65   | 50.16   | 50.21   | 50.26   | 49.87   | 48.95   |
| O3C3C2C1  | 172.59  | 172.64  | 173.29  | 172.67  | 172.73  | 172.94  | 172.72  | 171.61  |
| H3C3C2C1  | -70.23  | -69.39  | -68.84  | -69.39  | -69.31  | -69.22  | -69.43  | -70.58  |
| H2qC2C3C4 | 171.51  | 172.60  | 172.98  | 172.52  | 172.57  | 172.66  | 172.24  | 171.62  |
| H2qC2C3O3 | -64.74  | -64.96  | -64.38  | -64.98  | -64.90  | -64.66  | -64.91  | -65.72  |
| H2qC2C3H3 | 52.44   | 53.00   | 53.48   | 52.96   | 53.06   | 53.18   | 52.95   | 52.09   |
| Hx2C2C3C4 | -70.99  | -69.38  | -68.91  | -69.46  | -69.45  | -69.36  | -69.76  | -70.56  |
| H2xC2C3O3 | 52.76   | 53.06   | 53.73   | 53.04   | 53.07   | 53.32   | 53.09   | 52.11   |
| H2xC2C3H3 | 169.94  | 171.02  | 171.60  | 170.98  | 171.03  | 171.16  | 170.95  | 169.92  |
| C2C3C4C5  | -52.23  | -53.71  | -54.12  | -53.70  | -53.72  | -53.77  | -53.25  | -52.69  |
| O4C4C3C2  | 71.16   | 68.32   | 68.00   | 68.39   | 68.40   | 68.47   | 69.04   | 69.15   |
| H4C4C3C2  | -173.02 | -175.37 | -175.64 | -175.31 | -175.28 | -175.18 | -174.54 | -174.40 |
| O3C3C4C5  | -176.28 | -176.62 | -177.16 | -176.67 | -176.72 | -176.83 | -176.51 | -175.78 |
| O3C3C4O4  | -52.88  | -54.59  | -55.03  | -54.58  | -54.60  | -54.59  | -54.21  | -53.93  |
| O3C3C4H4  | 62.94   | 61.72   | 61.32   | 61.71   | 61.72   | 61.76   | 62.21   | 62.52   |
| H3C3C4C5  | 67.52   | 66.38   | 65.97   | 66.36   | 66.30   | 66.31   | 66.55   | 67.37   |
| H3C3C4O4  | -169.08 | -171.59 | -171.91 | -171.55 | -171.57 | -171.45 | -171.16 | -170.78 |
| H3C3C4H4  | -53.27  | -55.28  | -55.55  | -55.25  | -55.26  | -55.10  | -54.74  | -54.34  |
| C2C3O3H3  | -80.63  | -78.36  | -77.74  | -78.35  | -78.40  | -78.40  | -78.67  | -79.31  |
| C4C3O3H3  | 42.73   | 43.52   | 44.26   | 43.61   | 43.57   | 43.70   | 43.62   | 43.11   |
| H3C3O3H3  | 160.23  | 161.88  | 162.49  | 161.91  | 161.86  | 161.89  | 161.79  | 161.17  |
| C3C4C5O6  | 57.84   | 59.88   | 59.77   | 59.85   | 59.82   | 59.73   | 59.13   | 59.54   |
| C3C4C5H5q | 174.87  | 176.28  | 176.23  | 176.28  | 176.31  | 176.25  | 175.88  | 176.03  |
| C3C4C5H5x | -64.55  | -62.35  | -62.32  | -62.37  | -62.42  | -62.43  | -63.19  | -62.62  |
| O4C4C5O6  | -64.74  | -61.34  | -61.58  | -61.43  | -61.49  | -61.72  | -62.42  | -61.57  |
| O4C4C5H5q | 52.29   | 55.07   | 54.88   | 55.00   | 55.01   | 54.80   | 54.32   | 54.92   |
| O4C4C5H5x | 172.87  | 176.43  | 176.33  | 176.35  | 176.27  | 176.12  | 175.26  | 176.27  |
| H4C4C5O6  | 178.21  | -179.09 | -179.35 | -179.15 | -179.24 | -179.43 | 179.92  | -179.35 |
| H4C4C5H5q | -64.76  | -62.68  | -62.88  | -62.72  | -62.75  | -62.91  | -63.34  | -62.86  |
| H4C4C5H5x | 55.82   | 58.68   | 58.56   | 58.62   | 58.51   | 58.40   | 57.59   | 58.49   |
| H4O4C4C3  | -86.07  | -86.16  | -86.09  | -86.04  | -86.14  | -86.31  | -86.15  | -85.34  |
| C5C4O4H4  | 36.39   | 35.32   | 35.32   | 35.48   | 35.39   | 35.21   | 35.50   | 35.96   |
| H4C4O4H4  | 155.94  | 155.58  | 155.60  | 155.70  | 155.62  | 155.38  | 155.52  | 156.24  |
| C4C5O6C1  | -61.12  | -62.90  | -62.66  | -62.84  | -62.78  | -62.66  | -62.38  | -63.26  |
| C1O6C5H5q | 178.83  | 177.61  | 177.78  | 177.63  | 177.66  | 177.72  | 178.01  | 177.22  |

C106C5H5x    61.10    59.24    59.30    59.28    59.34    59.35    59.76    58.83

<sup>a</sup> Frozen core, unless otherwise specified.

<sup>b</sup> 6-311+G(3df,2pd).

Table S5. DFT and *ab initio* structures of fructose (in Å and degrees)

| Method                  | MP2 <sup>a</sup> | MP2 <sup>a</sup>   | B3LYP              | CCSD <sup>a</sup> |
|-------------------------|------------------|--------------------|--------------------|-------------------|
| Basis set               | cc-pVTZ          | 6-311 <sup>b</sup> | 6-311 <sup>b</sup> | cc-pVTZ           |
| O1H1'                   | 0.9648           | 0.9633             | 0.9633             | 0.9607            |
| C1O1                    | 1.4221           | 1.4192             | 1.4223             | 1.4180            |
| C2C1                    | 1.5182           | 1.5198             | 1.5304             | 1.5213            |
| H1 <sub>s</sub> C1      | 1.0858           | 1.0863             | 1.0870             | 1.0866            |
| H1 <sub>R</sub> C1      | 1.0904           | 1.0908             | 1.0914             | 1.0911            |
| O6C2                    | 1.4122           | 1.4094             | 1.4137             | 1.4073            |
| H2'O2                   | 0.9698           | 0.9685             | 0.9676             | 0.9640            |
| C3C2                    | 1.5210           | 1.5238             | 1.5365             | 1.5251            |
| O3C3                    | 1.4216           | 1.4186             | 1.4220             | 1.4175            |
| H3'O3                   | 0.9670           | 0.9658             | 0.9655             | 0.9625            |
| H3C3                    | 1.0888           | 1.0899             | 1.0897             | 1.0888            |
| C4C3                    | 1.5183           | 1.5194             | 1.5297             | 1.5221            |
| O4C4                    | 1.4206           | 1.4180             | 1.4220             | 1.4166            |
| H4'O4                   | 0.9655           | 0.9643             | 0.9639             | 0.9609            |
| H4C4                    | 1.0950           | 1.0961             | 1.0959             | 1.0949            |
| O2C2                    | 1.4118           | 1.4093             | 1.4145             | 1.4084            |
| C6O6                    | 1.4267           | 1.4245             | 1.4277             | 1.4224            |
| H6 <sub>s</sub> C6      | 1.0866           | 1.0871             | 1.0874             | 1.0869            |
| H6 <sub>R</sub> C6      | 1.0921           | 1.0926             | 1.0930             | 1.0925            |
| C5C6                    | 1.5135           | 1.5140             | 1.5203             | 1.5170            |
| O5C5                    | 1.4152           | 1.4131             | 1.4175             | 1.4127            |
| H5'O5                   | 0.9660           | 0.9645             | 0.9643             | 0.9614            |
| H5C5                    | 1.0961           | 1.0969             | 1.0975             | 1.0958            |
| C2C1O1H1'               | -64.71           | -65.83             | -68.07             | -65.36            |
| H1 <sub>s</sub> C1O1H1' | 176.56           | 175.41             | 172.93             | 175.71            |
| H1 <sub>R</sub> C1O1H1' | 56.33            | 55.10              | 53.51              | 55.80             |
| O2C2C1O1                | -52.00           | -52.27             | -50.91             | -52.79            |
| H2'O2C2C1               | 35.31            | 35.76              | 35.21              | 36.40             |
| C3C2C1O1                | -170.94          | -171.17            | -169.99            | -171.78           |
| O3C3C2C1                | 63.87            | 64.49              | 65.63              | 64.33             |
| H3'O3C3C2               | 46.57            | 46.62              | 46.51              | 46.87             |
| H3C3C2C1                | -53.98           | -53.29             | -51.39             | -53.37            |
| C4C3C2C1                | -173.18          | -172.66            | -170.60            | -172.48           |
| O4C4C3C2                | 173.99           | 173.85             | 173.19             | 173.72            |
| H4'O4C4C3               | 43.29            | 44.42              | 44.43              | 43.89             |
| H4C4C3C2                | -64.39           | -64.50             | -65.88             | -64.83            |
| O6C2C1O1                | 68.43            | 68.30              | 69.52              | 67.63             |
| C6O6C2C1                | 179.65           | 179.93             | 178.08             | 179.64            |
| H6 <sub>s</sub> C6O6C2  | -177.60          | -177.86            | -176.75            | -177.46           |
| H6 <sub>R</sub> C6O6C2  | 64.32            | 63.94              | 65.68              | 64.53             |
| C5C6O6C2                | -57.93           | -58.17             | -56.78             | -57.72            |
| O5C5C6O6                | -66.40           | -66.26             | -69.27             | -67.10            |
| H5'O5C5C6               | 165.22           | 166.75             | 166.76             | 166.13            |
| H5C5C6O6                | 172.98           | 173.27             | 170.92             | 172.51            |
| C1O1H1'                 | 105.70           | 106.50             | 107.72             | 106.37            |
| C2C1O1                  | 109.07           | 109.21             | 110.02             | 109.38            |
| H1 <sub>s</sub> C1O1    | 107.12           | 107.06             | 106.81             | 107.21            |
| H1 <sub>R</sub> C1O1    | 111.95           | 111.90             | 111.61             | 111.82            |
| O2C2C1                  | 109.60           | 109.94             | 109.76             | 109.75            |
| H2'O2C2                 | 104.81           | 105.60             | 106.72             | 105.79            |

|                      |        |        |        |        |
|----------------------|--------|--------|--------|--------|
| C3C2C1               | 113.53 | 113.25 | 113.08 | 113.17 |
| O3C3C2               | 111.81 | 111.76 | 112.04 | 111.82 |
| H3'O3C3              | 105.08 | 105.84 | 107.06 | 105.93 |
| H3C3C2               | 108.65 | 108.72 | 108.33 | 108.50 |
| C4C3C2               | 110.11 | 109.99 | 110.79 | 110.34 |
| O4C4C3               | 110.38 | 110.57 | 110.78 | 110.49 |
| H4'O4C4              | 105.89 | 106.79 | 107.80 | 106.63 |
| H4C4C3               | 108.73 | 108.70 | 108.61 | 108.71 |
| O6C2C1               | 104.61 | 104.71 | 105.06 | 104.91 |
| C6O6C2               | 113.93 | 114.31 | 115.93 | 114.69 |
| H6 <sub>S</sub> C6O6 | 105.60 | 105.64 | 105.62 | 105.81 |
| H6 <sub>R</sub> C6O6 | 110.16 | 110.14 | 110.06 | 110.15 |
| C5C6O6               | 112.39 | 112.08 | 112.67 | 112.40 |
| O5C5C6               | 108.98 | 108.78 | 109.23 | 108.95 |
| H5'O5C5              | 105.24 | 106.12 | 107.09 | 106.00 |
| H5C5C6               | 108.34 | 108.53 | 108.15 | 108.35 |

<sup>a</sup> Frozen core approximation.

<sup>b</sup> 6-311+G(3df,2pd).



Table S6. Cartesian coordinates in the principal axis system for deoxyribose (in Å).

| atom    | $a_e^{\text{SE}}$ | $b_e^{\text{SE}}$ | $c_e^{\text{SE}}$ | $r_e^{\text{SE}}$ <sup>a</sup> |
|---------|-------------------|-------------------|-------------------|--------------------------------|
| O6 ring | -1.2422(10)       | -1.0522(12)       | -0.4195(19)       | 1.68110(70)                    |
| C1      | -1.45958(89)      | 0.3398(13)        | -0.58329(92)      | 1.60810(90)                    |
| O1      | -2.1560(14)       | 0.8846(14)        | 0.5114(15)        | 2.3859(13)                     |
| H1'     | -3.0083(22)       | 0.4446(35)        | 0.5610(40)        | 3.0923(23)                     |
| H1      | -2.0481(46)       | 0.4107(39)        | -1.4986(27)       | 2.5709(24)                     |
| C2      | -0.1533(13)       | 1.1008(11)        | -0.7225(12)       | 1.3256(10)                     |
| H2x     | 0.3080(38)        | 0.8208(42)        | -1.6702(28)       | 1.8863(33)                     |
| H2q     | -0.3515(38)       | 2.1700(13)        | -0.7535(48)       | 2.3239(18)                     |
| C3      | 0.8155(11)        | 0.7727(13)        | 0.4097(13)        | 1.1958(11)                     |
| O3      | 2.0856(15)        | 1.3531(10)        | 0.1843(16)        | 2.4929(13)                     |
| H3'     | 2.5227(32)        | 0.7819(36)        | -0.4565(35)       | 2.6802(31)                     |
| H3      | 0.4397(37)        | 1.1896(46)        | 1.3438(23)        | 1.8478(29)                     |
| C4      | 0.9289(11)        | -0.7380(13)       | 0.5619(13)        | 1.3127(11)                     |
| O4      | 1.6090(24)        | -1.2791(15)       | -0.5690(16)       | 2.1328(20)                     |
| H4'     | 0.9425(46)        | -1.4310(42)       | -1.2464(30)       | 2.1189(40)                     |
| H4      | 1.5440(39)        | -0.9701(38)       | 1.4309(29)        | 2.3179(17)                     |
| C5      | -0.4465(17)       | -1.3500(11)       | 0.7166(15)        | 1.5923(10)                     |
| H5q     | -0.3808(42)       | -2.4346(13)       | 0.7532(43)        | 2.5767(17)                     |
| H5x     | -0.9215(41)       | -0.9878(41)       | 1.6295(34)        | 2.1166(32)                     |

<sup>a</sup> Distance from the center of mass.

Table S7. Cartesian coordinates in the principal axis system for fructose (in Å).

| Atom            | $a_e^{\text{SE}}$ | $b_e^{\text{SE}}$ | $c_e^{\text{SE}}$ | $r_e^{\text{SE}}$ <sup>a</sup> |
|-----------------|-------------------|-------------------|-------------------|--------------------------------|
| H1'             | -3.1014(35)       | -1.3135(27)       | -0.3608(46)       | 3.3874(32)                     |
| O1              | -3.2958(16)       | -0.3726(27)       | -0.3188(26)       | 3.3321(16)                     |
| C1              | -2.1681(13)       | 0.2937(26)        | -0.8651(14)       | 2.3527(13)                     |
| C2              | -0.9647(12)       | 0.0638(14)        | 0.0312(19)        | 0.9673(12)                     |
| H1 <sub>S</sub> | -2.4036(22)       | 1.3528(28)        | -0.8940(38)       | 2.8994(18)                     |
| H1 <sub>R</sub> | -1.9384(23)       | -0.0541(54)       | -1.8741(14)       | 2.6968(19)                     |
| O2              | -1.2842(32)       | 0.4178(45)        | 1.3599(20)        | 1.9165(26)                     |
| H2'             | -2.2059(35)       | 0.1557(62)        | 1.4876(36)        | 2.6651(24)                     |
| C3              | 0.2483(14)        | 0.8935(19)        | -0.3594(26)       | 0.9945(19)                     |
| O3              | 0.0062(32)        | 2.2834(19)        | -0.2082(39)       | 2.2929(20)                     |
| H3'             | -0.4009(54)       | 2.3882(43)        | 0.6592(49)        | 2.5098(35)                     |
| H3              | 0.4606(42)        | 0.7202(44)        | -1.4131(31)       | 1.6516(30)                     |
| C4              | 1.4606(21)        | 0.4739(29)        | 0.4531(33)        | 1.6010(19)                     |
| O4              | 2.6236(21)        | 1.1421(31)        | -0.0100(48)       | 2.8614(18)                     |
| H4'             | 2.3757(46)        | 2.0615(28)        | -0.1493(69)       | 3.1490(31)                     |
| H4              | 1.2751(51)        | 0.7074(75)        | 1.5066(26)        | 2.0967(33)                     |
| O6              | -0.6783(18)       | -1.3109(12)       | -0.0980(22)       | 1.4792(14)                     |
| C6              | 0.4324(16)        | -1.7637(22)       | 0.6738(25)        | 1.9369(19)                     |
| H6 <sub>S</sub> | 0.5505(40)        | -2.8167(23)       | 0.4331(53)        | 2.9025(21)                     |
| H6 <sub>R</sub> | 0.2177(49)        | -1.6591(55)       | 1.7395(24)        | 2.4137(36)                     |
| C5              | 1.7037(16)        | -1.0154(19)       | 0.3352(26)        | 2.0115(20)                     |
| O5              | 2.0900(29)        | -1.3397(31)       | -0.9864(28)       | 2.6714(25)                     |
| H5'             | 2.7559(42)        | -0.6902(46)       | -1.2353(51)       | 3.0980(36)                     |
| H5              | 2.4800(27)        | -1.3132(53)       | 1.0494(43)        | 2.9960(27)                     |

<sup>a</sup> Distance from the center of mass.

Table S8. Substitution coordinates of fructose compared to the equilibrium Cartesian coordinates (all values in Å).

|                 | Substitution <sup>a</sup> |             |             | $r_e^{\text{SE}}$ |         |         |
|-----------------|---------------------------|-------------|-------------|-------------------|---------|---------|
|                 | $ a $                     | $ b $       | $ c $       | $a_e$             | $b_e$   | $c_e$   |
| C1              | 2.1672(7)                 | 0.2822(53)  | 0.8750(17)  | -2.1681           | 0.2937  | -0.8651 |
| C2              | 0.9557(16)                | $i^b$       | $i^b$       | -0.9647           | 0.0638  | 0.0312  |
| C3              | 0.1781(84)                | 0.8925(17)  | 0.3625(41)  | 0.2483            | 0.8935  | -0.3594 |
| C4              | 1.4627(10)                | 0.4744(32)  | 0.4525(33)  | 1.4606            | 0.4739  | 0.4531  |
| C5              | 1.7149(9)                 | 1.0090(15)  | 0.3259(46)  | 1.7037            | -1.0154 | 0.3352  |
| C6              | 0.4225(36)                | 1.7595(9)   | 0.6897(22)  | 0.4324            | -1.7637 | 0.6738  |
| O6 ring         | 0.6685(22)                | 1.3171(11)  | 0.0863(174) | -0.6783           | -1.3109 | -0.0980 |
| H1 <sub>R</sub> | 1.9305(17)                | 0.1016(315) | 1.8793(17)  | -1.9384           | -0.0541 | -1.8741 |
| H1 <sub>S</sub> | 2.4102(13)                | 1.3357(24)  | 0.9165(35)  | -2.4036           | 1.3528  | -0.8940 |

<sup>a</sup> The uncertainties are calculated using Costain's rule:  $\delta z = C/|z|$  with  $C = 0.0015 \text{ \AA}^2$  for heavy atoms and  $C = 0.0032 \text{ \AA}^2$  for hydrogen atoms.<sup>1</sup>

<sup>b</sup> Imaginary value.

(1) Rudolph, H. D.; Demaison, J., In *Equilibrium Molecular Structures: From Spectroscopy to Quantum Chemistry*, Demaison, J.; Boggs, J. E.; Császár, A. G., Eds. CRS Press: Boca Raton, 2011; pp 125-158.

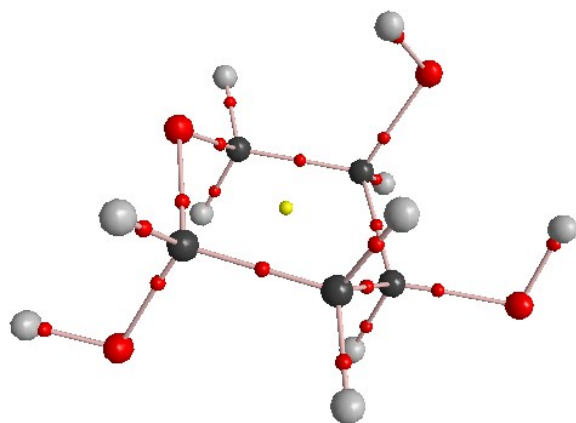

Fig. S1. Molecular graph for deoxyribose
